# Supplementary material
Source: publisher site journal article supplement (https://www.dovepress.com/article/418845)
Supplement: Supplementary file 1 [file get_supplementary_file.php]

Supplementary Materials

**Figure S1. Chemical structure of antiplatelet drugs.** The chemical structure of the active metabolite of clopidogrel, aspirin, ticagrelor, prasugrel, dipyridamole, tirofiban, and rivaroxaban were shown. Only prasugrel and the active metabolite of clopidogrel carry sulfhydryl groups. (Source: https://go.drugbank.com/).

# Supplementary Tables

# Table S1. Drug generic and brand names of antiplatelet drugs.

| **Drug** | **Class** | **Name** |
| --- | --- | --- |
| Clopidogrel | Generic | CLOPIDOGREL |
| Brand | DUOPLAVIN |
| Brand | PLAVIX |
| Brand | ZYLLT |
| Aspirin | Generic | ASPIRIN |
| Brand | ACETYLSALICYLIC ACID |
| Brand | AGGRENOX |
| Brand | ALKA-SELTZER |
| Brand | ALKA-SELTZER FRUIT CHEWS |
| Brand | ANACIN |
| Brand | ARTHRITEN INFLAMMATORY PAIN |
| Brand | ASCOMP |
| Brand | ASPI-COR |
| Brand | ASPIR-LOW |
| Brand | BAYER ASPIRIN |
| Brand | BAYER WOMENS |
| Brand | BC ARTHRITIS |
| Brand | BC ORIGINAL FORMULA |
| Brand | BUFFERIN |
| Brand | DUOPLAVIN |
| Brand | DURLAZA |
| Brand | ECOTRIN |
| Brand | ECPIRIN |
| Brand | ENDODAN REFORMULATED MAY 2009 |
| Brand | EQUAGESIC |
| Brand | EXAPRIN |
| Brand | EXCEDRIN |
| Brand | EXCEDRIN PM TRIPLE ACTION |
| Brand | FASPRIN |
| Brand | FIORINAL |
| Brand | FIORINAL WITH CODEINE |
| Brand | GOODY'S BODY PAIN |
| Brand | GOODY'S EXTRA STRENGTH |
| Brand | GOODY'S PM |
| Brand | MINIPRIN |
| Brand | NORGESIC FORTE |
| Brand | ORPHENGESIC |
| Brand | PAMPRIN MAX FORMULA |
| Brand | ROBAXISAL |
| Brand | ST. JOSEPH ASPIRIN |
| Brand | STANBACK HEADACHE POWDER REFORMULATED JAN 2011 |
| Brand | TRIANAL |
| Brand | TRIANAL C |
| Brand | VANQUISH |
| Brand | VAZALORE |
| Brand | YOSPRALA |
| Ticagrelor | Generic | TICAGRELOR |
| Brand | BRILINTA |
| Brand | BRILIQUE |
| Prasugrel | Generic | PRASUGREL |
| Brand | EFFIENT |
| Brand | EFIENT |
| Dipyridamole | Generic | DIPYRIDAMOLE |
| Brand | AGGRENOX |
| Brand | PERSANTINE |
| Tirofiban | Generic | TIROFIBAN |
| Brand | AGGRASTAT |
| Rivaroxaban | Generic | RIVAROXABAN |
| Brand | XARELTO |

**Table S2. Demographic information of patients included in the case series.**

| **No.** | **Age(year)** | **Sex** | **Race** | **Report time** |
| --- | --- | --- | --- | --- |
| 1 | 81 | Male | East Asian | 2013 |
| 2 | 84 | Female | East Asian | 2013 |
| 3 | 84 | Male | East Asian | 2014 |
| 4 | 86 | Male | East Asian | 2017 |
| 5 | 84 | Male | East Asian | 2016 |
| 6 | 84 | Male | East Asian | 2016 |
| 7 | 72 | Male | East Asian | 2016 |
| 8 | 84 | Male | East Asian | 2016 |
| 9 | 72 | Male | East Asian | 2016 |
| 10 | 72 | Male | East Asian | 2016 |
| 11 | 84 | Male | East Asian | 2016 |
| 12 | 72 | Male | East Asian | 2016 |
| 13 | 84 | Male | East Asian | 2016 |
| 14 | 72 | Male | East Asian | 2016 |
| 15 | 84 | Male | East Asian | 2016 |
| 16 | 88 | Male | Non-East Asian | 2017 |
| 17 | 79 | Male | Non-East Asian | 2017 |
| 18 | 79 | Male | Non-East Asian | 2017 |
| 19 | 79 | Male | Non-East Asian | 2018 |
| 20 | 79 | Male | Non-East Asian | 2019 |
| 21 | 79 | Male | Non-East Asian | 2018 |
| 22 | 79 | Male | Non-East Asian | 2018 |
| 23 | 79 | Male | Non-East Asian | 2018 |
| 24 | 79 | Male | Non-East Asian | 2018 |
| 25 | 79 | Male | Non-East Asian | 2017 |
| 26 | 79 | Male | Non-East Asian | 2018 |
| 27 | 79 | Male | Non-East Asian | 2018 |
| 28 | 79 | Male | Non-East Asian | 2018 |
| 29 | 79 | Male | East Asian | 2018 |
| 30 | 79 | Male | Non-East Asian | 2019 |
| 31 | 63 | Male | East Asian | 2020 |
| 32 | 63 | Male | East Asian | 2020 |
| 33 | 67 | Male | Non-East Asian | 2020 |
| 34 | 67 | Male | Non-East Asian | 2020 |
| 35 | 67 | Male | Non-East Asian | 2020 |
| 36 | 67 | Male | Non-East Asian | 2020 |
| 37 | 67 | Male | Non-East Asian | 2020 |
| 38 | 63 | Female | East Asian | 2020 |
| 39 | 63 | Male | East Asian | 2020 |
| 40 | 66 | Male | East Asian | 2021 |
| 41 | 66 | Male | East Asian | 2021 |
| 42 | 61 | Male | Non-East Asian | 2021 |
| 43 | 61 | Male | Non-East Asian | 2021 |
| 44 | 61 | Male | Non-East Asian | 2021 |
| 45 | 61 | Male | Non-East Asian | 2021 |
| 46 | 88 | Male | Non-East Asian | 2006 |
| 47 | 58 | Male | Non-East Asian | 2018 |
| 48 | 84 | Male | East Asian | 2020 |
| 49 | 69 | Female | Non-East Asian | 2022 |
| 50 | 76 | Female | East Asian | 2022 |
| 51 | 82 | Male | East Asian | 2022 |

**Table S3. Clinical characteristics of patients with clopidogrel-induced IAS.**

| **No** | **Ref.** | **Recognizeda** | **Age (year)** | **Sex** | **Race** | **HLA genotype**  **(DRB1 and DQB1)** | **Onset time** | **Combination drug** | **Therapy** | **Recovery timeb** |
| --- | --- | --- | --- | --- | --- | --- | --- | --- | --- | --- |
| 1 | Bortolotti 2006 (1) | No | 88 | M | Non-East Asian | DRB1*0403/09 | NA | Sotalol and nicardipine | Prednisone, starting dose was 1 mg·kg-1·d-1, decrement dose and stop time not mentioned | “Promptly” |
| 2 | Yamada 2016 (2) | Yes | 72 | M | East Asian | DRB1*0406 | NA | NA | 1. Drug discontinuation  2. Eat meals six times a day | 5 months |
| 3 | Yamada 2016 (2) | Yes | 84 | M | East Asian | DRB1*0406 | NA | NA | 1. Drug discontinuation  2. Eat meals six times a day | 7 months |
| 4 | Rajpal 2017 (3) | Yes | 79 | M | Non-East Asian | DRB1*0404 | 3 weeks | Torsemide, fluticasone nasal spray, ProAir HFA (Teva Respiratory, Horsham, PA) as needed, allopurinol, colchicine, vitamin D, doxazosin, metoprolol, Xarelto (Janssen Pharmaceuticals, Titusville, NJ), and a multivitamin | 1. Drug discontinuation and switch to another antiplatelet drug  2. Diazoxide (with minimal response to hypoglycemia)  3. Small, frequent low carbohydrate meals  4. Glucocorticoids (dexamethasone) | 4 months |
| 5 | Hunter 2018 (4) | No | 58 | M | Non-East Asian | NA | 2 years | Acitretin, coal tar solution 5%, oilatum, sodium valproate, carbamazepine, and simvastatin | 1. Frequent small meals, particularly in the evening period  2. Glucocorticoids (prednisone) | 17 months |
| 6 | Jiang 2020 (5) | Yes | 63 | M | East Asian | DRB1*0404/0901 | 10 days | Candesartan (4 mg daily) | 1. Drug discontinuation  2. Frequent low carbohydrate meals  3. Glucocorticoids (prednisone) | 42 weeks |
| 7 | Calder 2020 (6) | Yes | 67 | M | Non-East Asian | DRB1*04 | 9 months | Aspirin, atorvastatin, perindopril, and nicorandil | 1. Drug discontinuation  2. Oral dexamethasone, and diazoxide therapy (not sufficient to safely wean the dextrose infusion)  3. Plasma exchange | 13 days |
| 8 | Yoshino 2020 (7) | No | 84 | M | East Asian | DRB1*0403 | 2 years | Eicosatetraenoic acid, magnesium oxide, cilostazol, irbesartan, and silodosin | 1. Drug discontinuation  2. Low-carbohydrate diet  3. Glucocorticoids (prednisone) | ~7 years |
| 9 | Yang 2021 (8) | Yes | 66 | M | East Asian | DRB1*0403/0701  DQB1*0302/0202 | 1 week | NA | 1. Drug discontinuation  2. Diet modification  3. Acarbose | 5 months |
| 10 | Rajan 2021 (9) | Yes | 61 | M | Non-East Asian | NA | Months | Aspirin, metformin, liraglutide and pioglitazone | 1. Tapering dose of prednisone for two cycles  2. Clopidogrel was substituted with ticagrelor | 2 months |
| 11 | de Castro 2022 (10) | Yes | 69 | F | Non-East Asian | NA | 1 months | Aspirin 100 mg qd | 1. Drug discontinuation  2. Diet modification  3. Immunoadsorption | 4 months |
| 12 | Zhu 2022 (11) | Yes | 76 | F | East Asian | NA | 1 week | None | 1. Diet modification  2. Methylprednisolone 4 mg bid | 4 months |
| 13 | Index patient | Yes | 82 | M | East Asian | DRB1*0403/1147  DQB1*0301/0302 | 4 months | Perindopril, amlodipine besylate, isosorbide mononitrate, atorvastatin, aspirin, and finasteride | 1. Drug discontinuation  2. Frequent low carbohydrate meals  3. Alternative antiplatelet drug: rivaroxaban or ticagrelor | 3 months |

a, refers to whether or not IAS was attributed to clopidogrel in the article.

b, refers to the duration from diagnosis to normal/undetected IAA level. If not mentioned, no recurrence of hypoglycemia was chosen as the ending time point.

**Table S4. Therapy of patients with clopidogrel-induced IAS.**

| **No.** | **Drug Discontinuation** | **Drug Substitution** | **Diet Modification** | **Other Medication** | **Glucocorticoids** | **Immunotherapya** |
| --- | --- | --- | --- | --- | --- | --- |
| 1 |  |  |  |  | √ |  |
| 2 | √ |  | √ |  |  |  |
| 3 | √ |  | √ |  |  |  |
| 4 | √ | √ (Not given) | √ | √ (Diazoxide) | √ |  |
| 5 |  |  | √ |  | √ |  |
| 6 | √ |  | √ |  | √ |  |
| 7 | √ |  |  | √ (Diazoxide) | √ | √ |
| 8 | √ |  | √ |  | √ |  |
| 9 | √ |  | √ | √ (Acarbose) |  |  |
| 10 |  | √ (Ticagrelor) |  |  | √ |  |
| 11 | √ |  | √ |  |  | √ |
| 12 | √ |  |  |  | √ |  |
| 13 | √ | √ (Ticagrelor, rivaroxaban) | √ |  |  |  |

a Including plasma exchange, plasmapheresis and immunoadsorption.

**Table S5. Clinical characteristics comparison of East Asian and non-East Asian patients of clopidogrel-induced IAS.**

| **Characteristic** | **Total**  **(n=51)** | **East Asian (n=25)** | **Non-East Asian (n=26)** | **p-value** |
| --- | --- | --- | --- | --- |
| Number | 51 | 25 | 26 |  |
| Age/year | 74.8±8.6 | 76.2±8.4 | 73.4±8.7 | 0.930 |
| Sex |  |  |  |  |
| Male (ratio) | 47 (92%) | 22 (88%) | 25 (96%) | 0.350 |
| Female (ratio) | 4 (8%) | 3 (12%) | 1 (4%) |

Abbreviations: IAS, insulin autoimmune syndrome.

Note: there was one case with no race reported.

**Table S6. Reported treatment of CIAS and comparison to all IAS.**

|  | **CIAS (n=13)** | **All IAS (n=187)** | **p-value** |
| --- | --- | --- | --- |
| Frequent small meals | 9 | 78 | 0.8377 |
| Drug discontinuation | 10 | 50 | 0.1576 |
| Glucocorticoids | 8 | 80 | 0.5362 |
| Plasmapheresis/Immunoadsorption | 2 | 14 | 0.6941 |
| Rituximab | 0 | 10 | 0.6083 |
| Drug substitution | 3 | Not mentioned | NA |

Abbreviations: IAS, insulin autoimmune syndrome; CIAS, clopidogrel-induced IAS.

**Reference**

1. Bortolotti D, Mothe-Satney I, Ferrari P, Gautier N, Sonke J, Pallé S, Bernard G, Badetti JL, Fredenrich A, Van Obberghen E, et al. Spontaneous hypoglycaemia in the presence of both anti-insulin antibody and anti-insulin receptor antibody. *Diabetes Metab* (2006) 32:598–603. doi: 10.1016/S1262-3636(07)70314-2

2. Yamada E, Okada S, Saito T, Osaki A, Ozawa A, Yamada M. Insulin autoimmune syndrome during the administration of clopidogrel. *J Diabetes* (2016) 8:588–589. doi: 10.1111/1753-0407.12385

3. Rajpal A, Kassem LS, Moscoso-Cordero M, Arafah BM. Clopidogrel-Induced Insulin Autoimmune Syndrome: A Newly Recognized Cause of Hypoglycemia in a Patient Without Diabetes. *J Endocr Soc* (2017) 1:1217–1223. doi: 10.1210/js.2017-00316

4. Hunter A, Graham U, Lindsay JR. Insulin Autoimmune Syndrome: a rare case of hypoglycaemia resolving with immunosuppression. *Ulster Med J* (2018) 87:34–36.

5. Jiang Y, Wang L, Shi F, Zhou H, Zheng J, Cai J, Yang S, Ma J, Liu W. Insulin Autoimmune Syndrome After Exposure to Clopidogrel: A Case Report. *Endocr Metab Immune Disord Drug Targets* (2020) 20:1355–1362. doi: 10.2174/1871530320666191220111615

6. Calder GL, Ward GM, Sachithanandan N, MacIsaac RJ. Insulin Autoimmune Syndrome: A Case of Clopidogrel-induced Autoimmune Hypoglycemia. *J Clin Endocrinol Metab* (2020) 105:dgz301. doi: 10.1210/clinem/dgz301

7. Yoshino H, Kawakami K, Kohriyama K, Yoshino G, Matsunaga S, Takechi H. Long-term follow-up of insulin autoimmune syndrome in an elderly patient. *Clin Case Rep* (2020) 8:2941–2944. doi: 10.1002/ccr3.3150

8. Yang CC, Gu WJ, Lyu ZH, Cheng Y, Jia AH, Dou JT, Ba JM, Mu YM. [One case report of insulin autoimmune syndrome induced by clopidogrel]. *Zhonghua Nei Ke Za Zhi* (2021) 60:55–57. doi: 10.3760/cma.j.cn112138-20200221-00109

9. Rajan J, Cobos -Salinas Leopoldo M., Cigarroa C. Insulin autoimmune syndrome after coronary stent placement. *Journal of the American College of Cardiology* (2021) 77:1895–1895. doi: 10.1016/S0735-1097(21)03251-4

10. de Castro T, Beier C, Terkamp C, Oehler L, Schmidt BMW, Heck J, Stichtenoth D, Wedemeyer H, Leitolf H. [Insulin autoimmune syndrome : A rare, but important differential diagnosis of hypoglycemia]. *Internist (Berl)* (2022) 63:217–220. doi: 10.1007/s00108-021-01180-0

11. Zhu Q, Zhao H, Qiu W, Wu F, Qian C, Yang Y, Kang Y, Zheng F, Zhou J. Case Report: Recurrent Autoimmune Hypoglycemia Induced by Non-Hypoglycemic Medications. *Front Immunol* (2022) 13:855350. doi: 10.3389/fimmu.2022.855350
